# Supplementary material
Source: HighWire-hosted journal article supplement (https://jmg.bmj.com/content/56/2/63)
Supplement: inline-supplementary-material-1 [file inline-supplementary-material-1.pdf]

# BRCA1

GRCh37/hg19

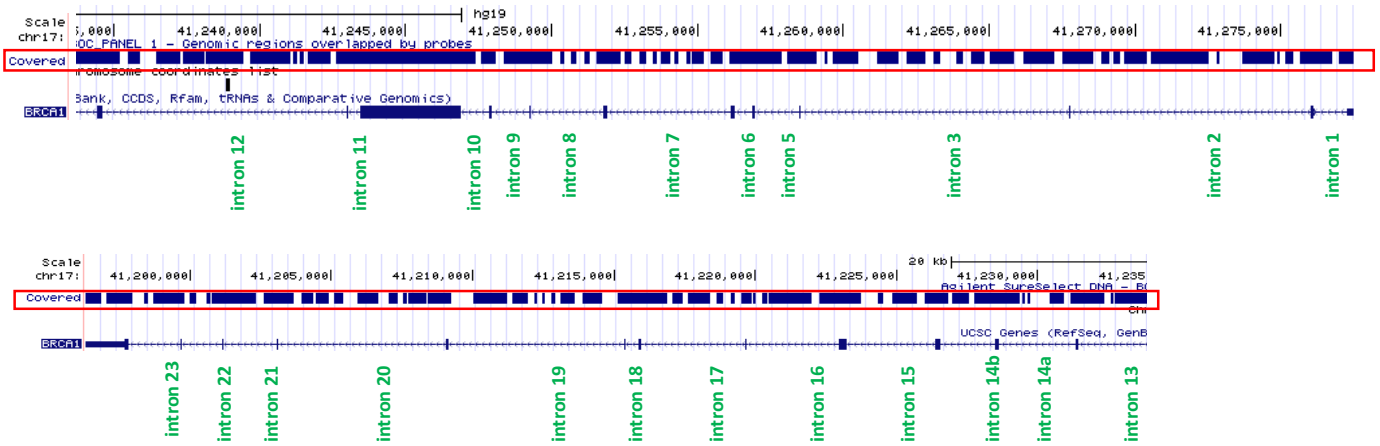

# BRCA2

GRCh37/hg19

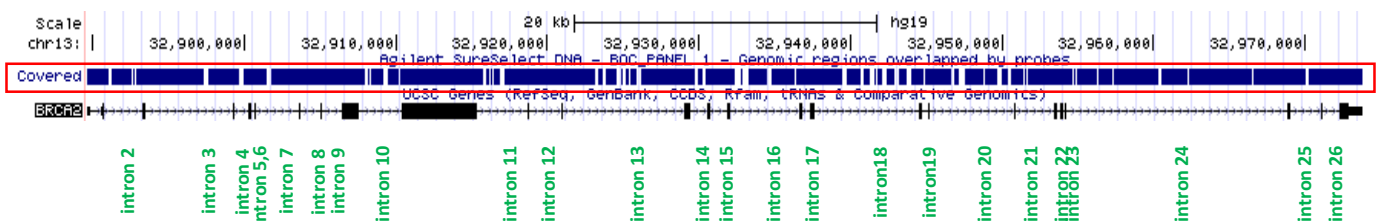

**Supplementary Figure 1.** Probe coverage over *BRCA1/2* genomic regions displayed using UCSC Browser. Region marked in red corresponds to a UCSC custom track showing a “dense” visualization of region captured by our probe design (BED files). Regions lacking coverage correspond to repetitive sequences or regions unsuitable for probe hybridization.

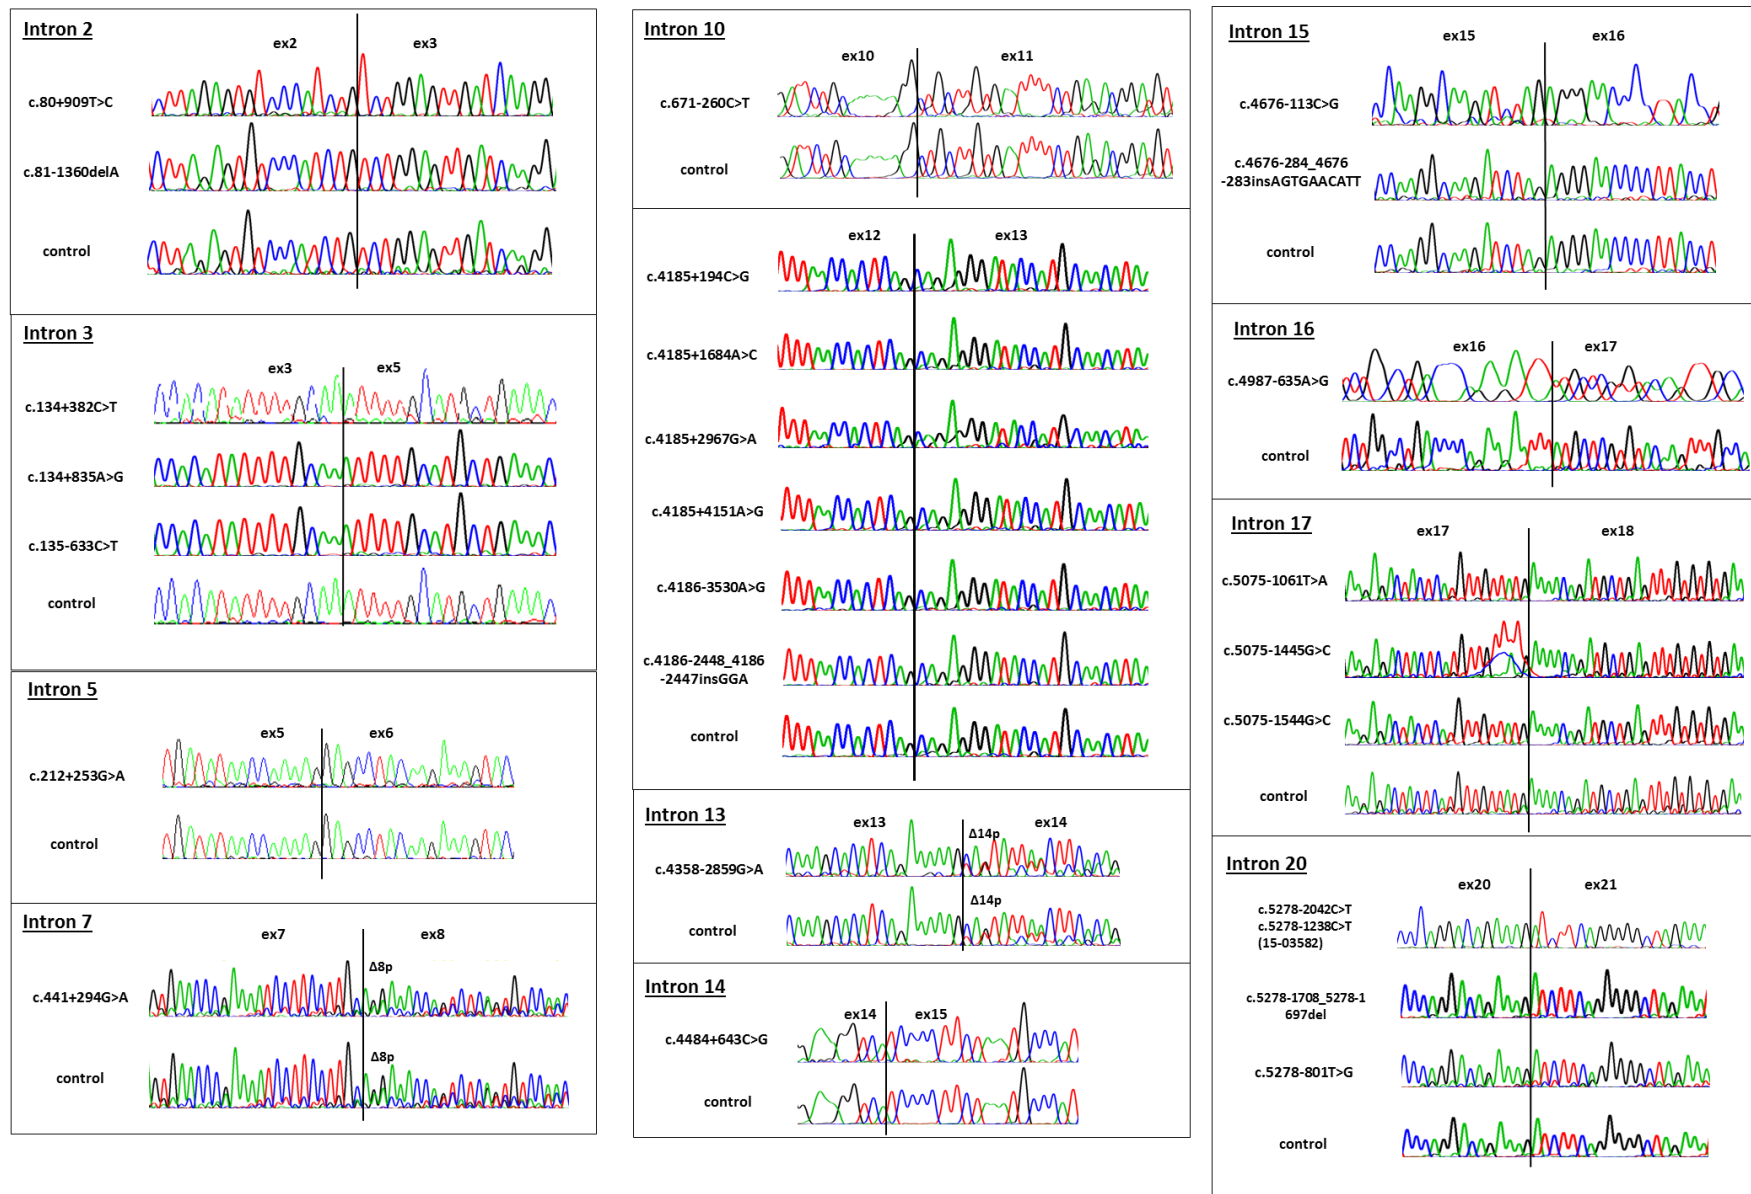

**Supplementary Figure 2. Sanger electropherograms from *BRCA1* deep intronic variants characterization in patient RNA.** Variants and one control for each sequence fragment are shown. Sequences covered exons adjacent to intron containing the variant. Full-length transcript was observed in all cases and no aberrant transcripts were detected. *BRCA1* alternative isoforms  $\Delta 8p$  and  $\Delta 14p$  were detected in carriers and controls when analyzing fragments involving exon 8 and exon 14, respectively.

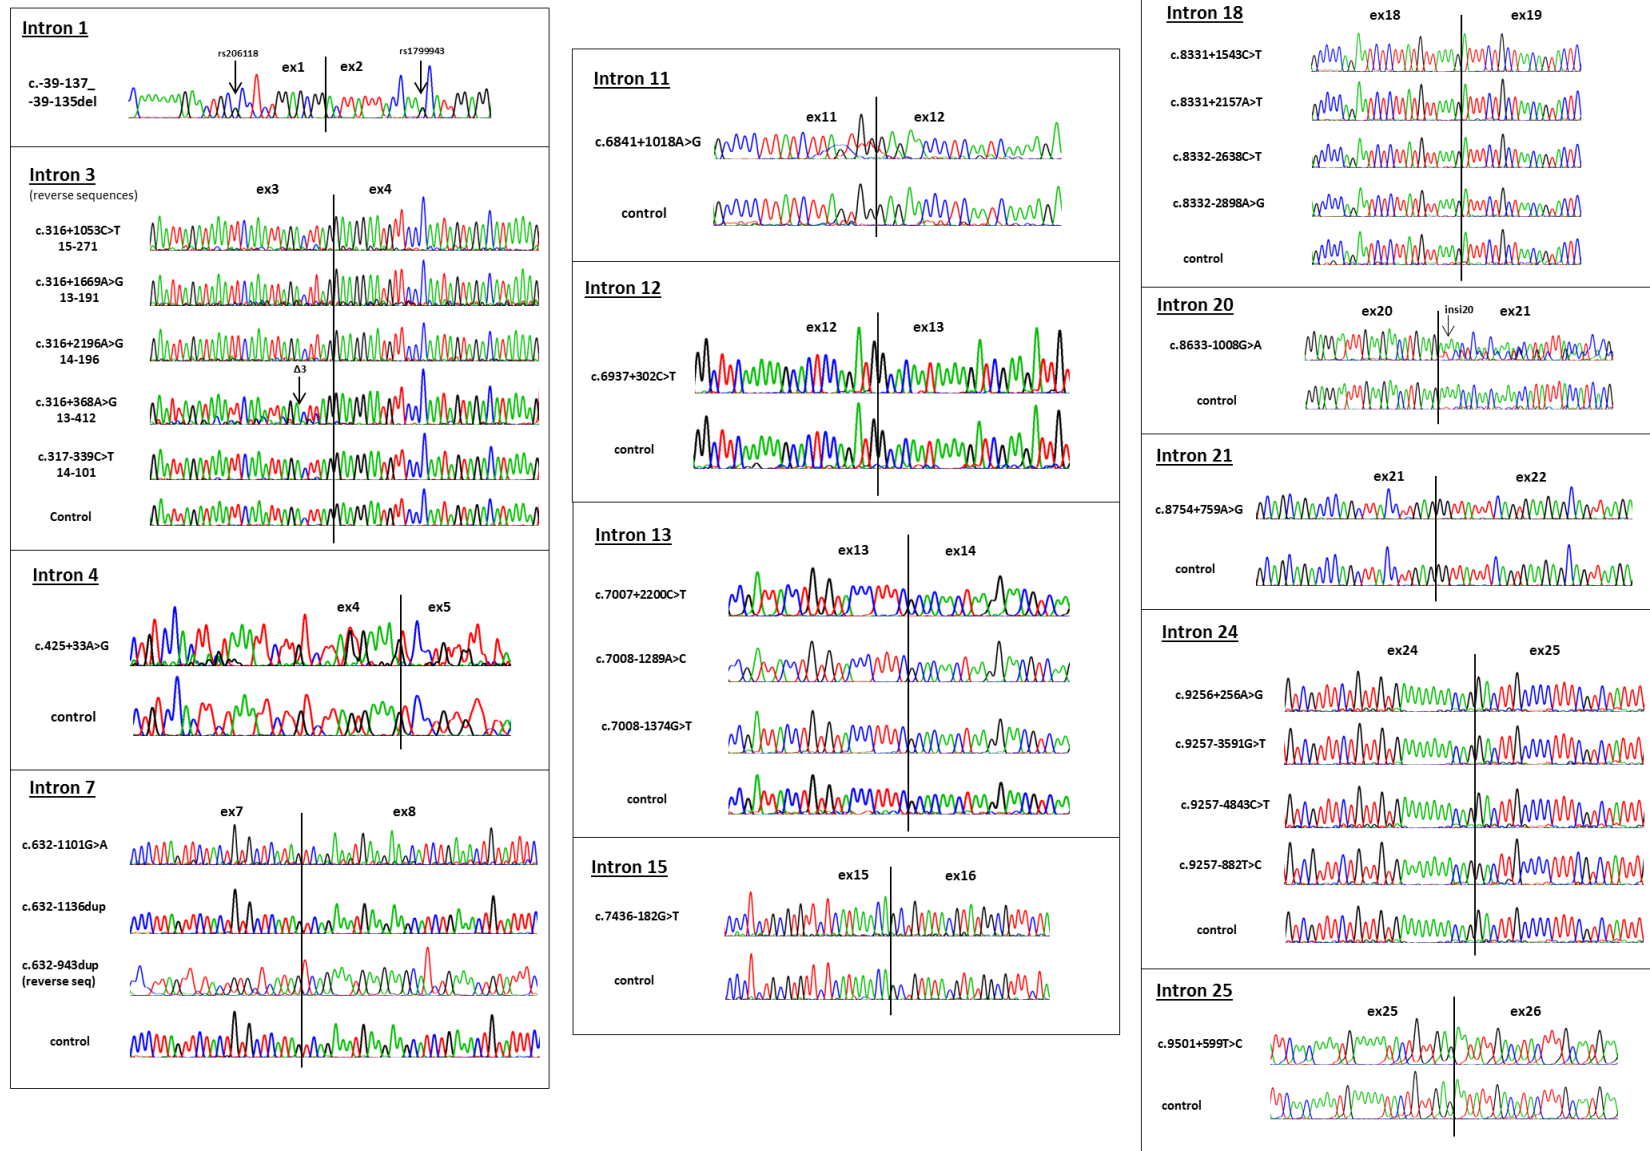

**Supplementary Figure 3. Sanger electropherograms from *BRCA2* deep intronic variants characterization in patient RNA.** Sanger from variants and one control for each fragment are shown. Sequences covered exons adjacent to intron containing the variant. Full-length transcript was observed in all cases and no aberrant transcripts were detected. *BRCA2* alternative isoforms  $\Delta 3$  and  $\nabla 20A$  were detected when analyzing fragments involving exon 3 and exon 20, respectively.

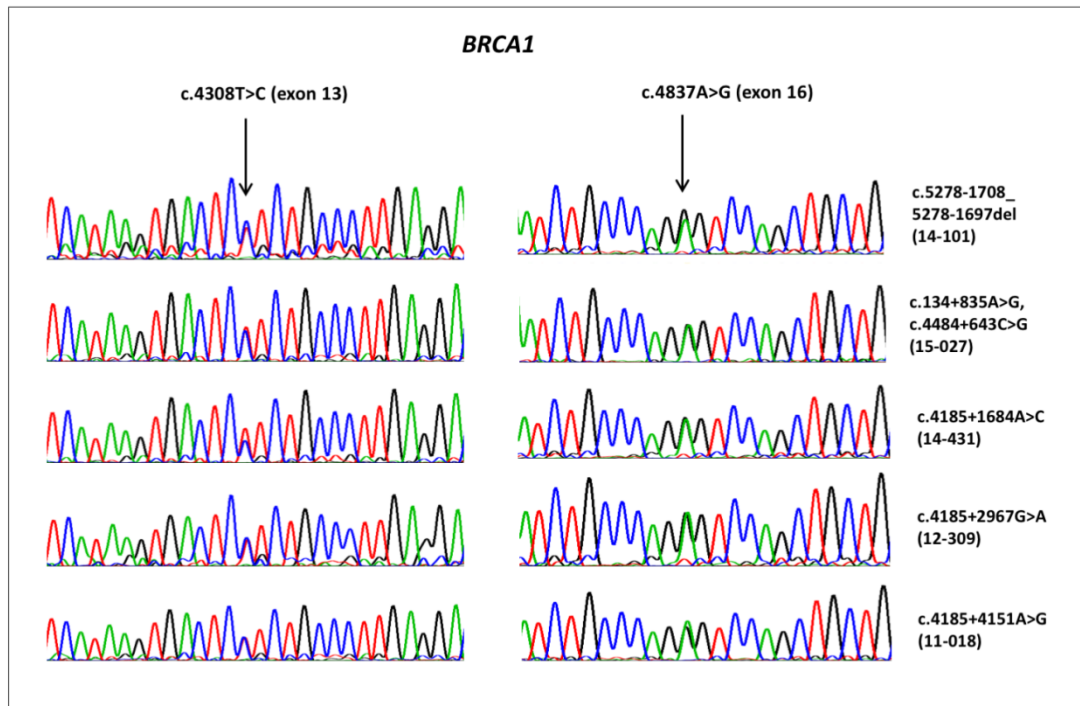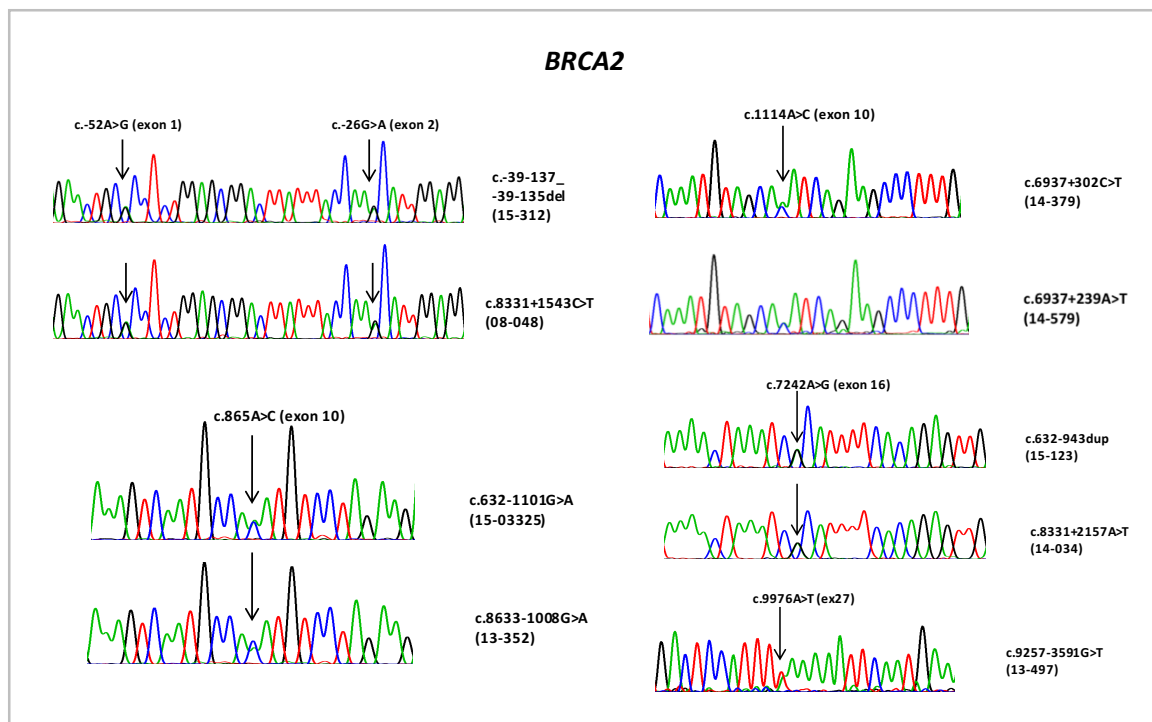

**Supplementary Figure 4.** Representative examples of *BRCA1/2* allelic imbalance assessment by Sanger sequencing. Long RT-PCR were designed to cover *BRCA1* and *BRCA2* exons containing informative exonic variants (marked with arrows), and Sanger sequencing was performed using internal primers.

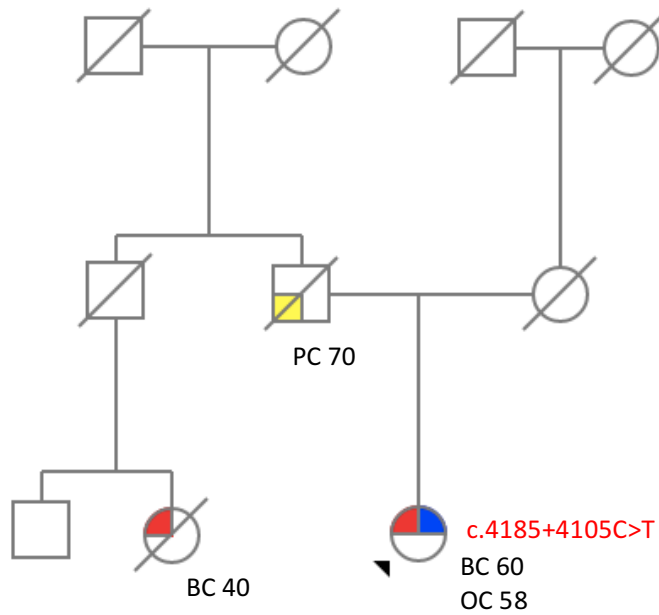

**Supplementary Figure 5. Family pedigree from *BRCA1* c.4185+4105C>T carrier.** Family originally from Lleida (Catalonia). Proband (arrow head) was diagnosed with ovarian cancer at age 58 and with an infiltrating ductal breast carcinoma (BC) at age 60. A paternal cousin was also diagnosed with BC at age 40.

### BRCA1 c.80+909T>C

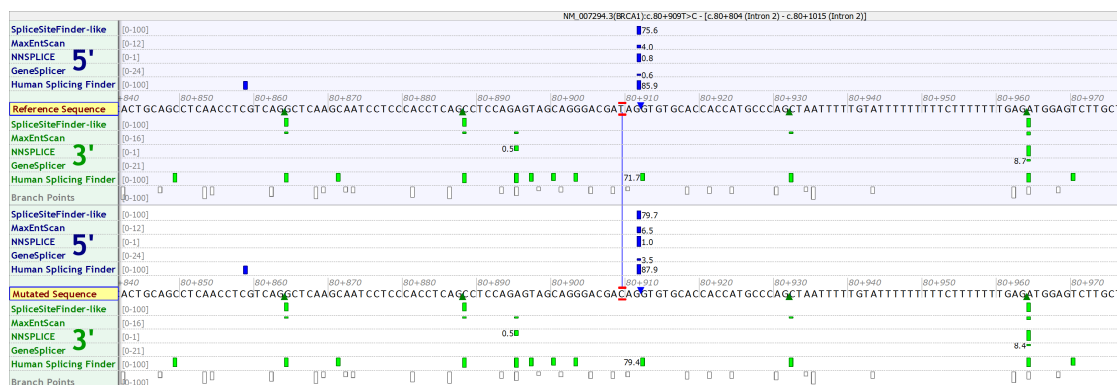

### BRCA1 c.4185+4105C>T

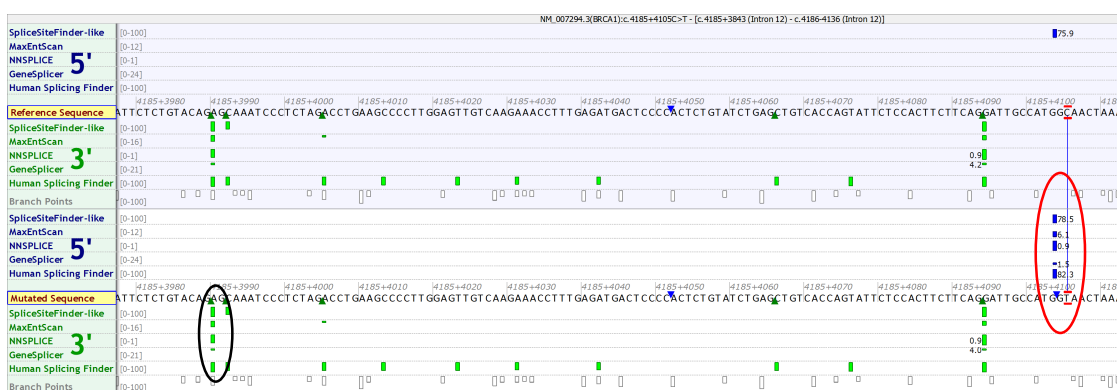

| In silico tools               | BRCA1 c.80+909T>C |              | BRCA1 c.4185+4105C>T |              |
|-------------------------------|-------------------|--------------|----------------------|--------------|
|                               | WT sequence       | VAR sequence | WT sequence          | VAR sequence |
| SpliceSiteFinder-like [0-100] | 75.6              | 79.7         | 75.9                 | 78.5         |
| MaxEntScan [0-12]             | 4.0               | 6.5          | -                    | 6.1          |
| NNSPLICE [0-1]                | 0.8               | 1.0          | -                    | 0.9          |
| GeneSplicer [0-24]            | 0.6               | 3.5          | -                    | 1.5          |
| Human Splicing Finder [0-100] | 85.9              | 87.9         | -                    | 82.3         |

**Supplementary Figure 6.** *In silico* splicing analysis of *BRCA1* c.80+909T>C and c.4185+4105C>T variants. Predictions from wild-type sequences (WT) and variant sequences (VAR) were obtained from 5 tools (SSF-like, MES, NNSPLICE, GeneSplicer and HSF) using Alamut software v2.10. Score ranges from each tool are detailed between brackets. *BRCA1* c.80+909T>C variant increases the strength of a preexisting donor site, whereas *BRCA1* c.4185+4105C>T variant is predicted to activate a cryptic donor site (red circle) which is recognized by the splicing machinery together with a preexisting acceptor site located 114nt upstream (black circle).

**A.**

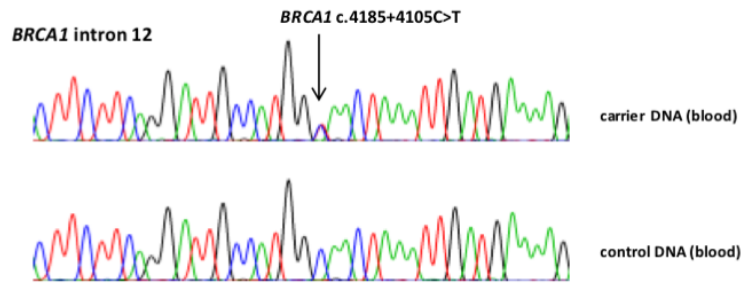

**B.**

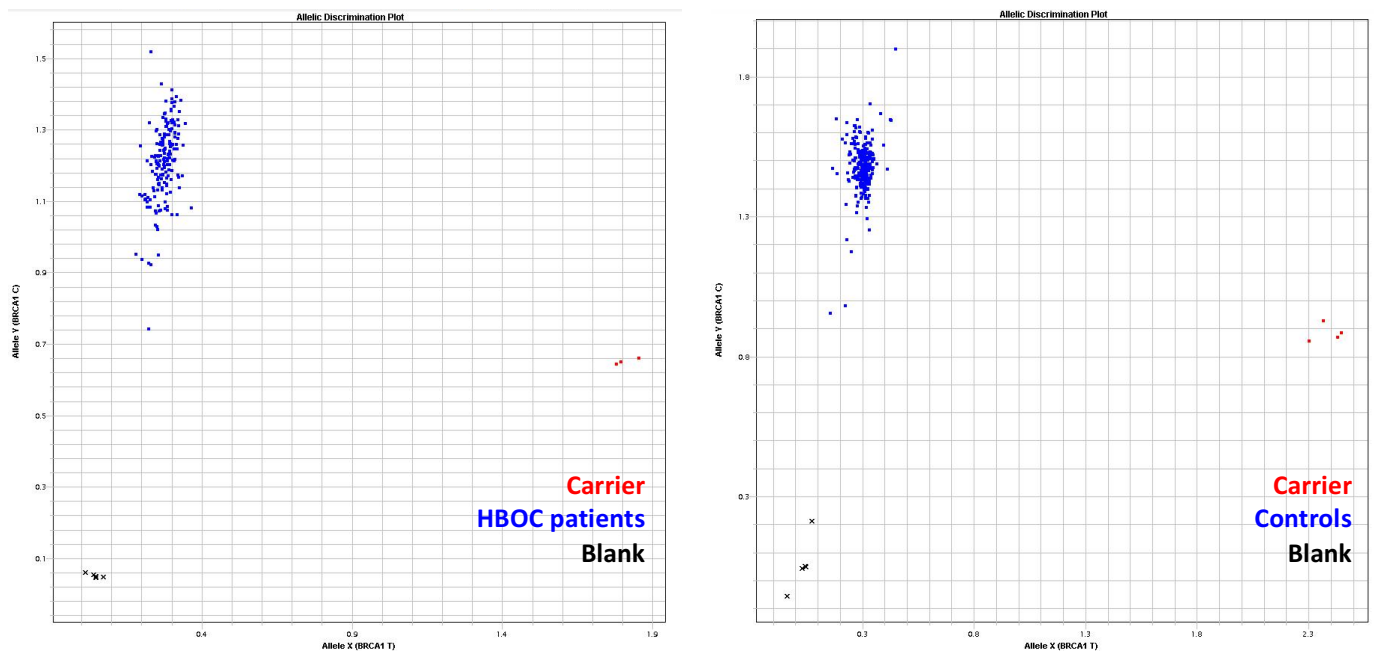

**Supplementary Figure 7. Sanger confirmation of *BRCA1* c.4185+4105C>T (A) and Genotyping of Spanish HBOC patients and controls (B).** A total of 1,030 HBOC patients with uninformative *BRCA1/2* results and 327 Spanish controls were genotyped at *BRCA1* c.4185+4105C>T. Allelic discrimination plots are shown. Variant carrier identified in this study (in red) was used as positive control.

**BRCA1**  
GRCh37/hg19

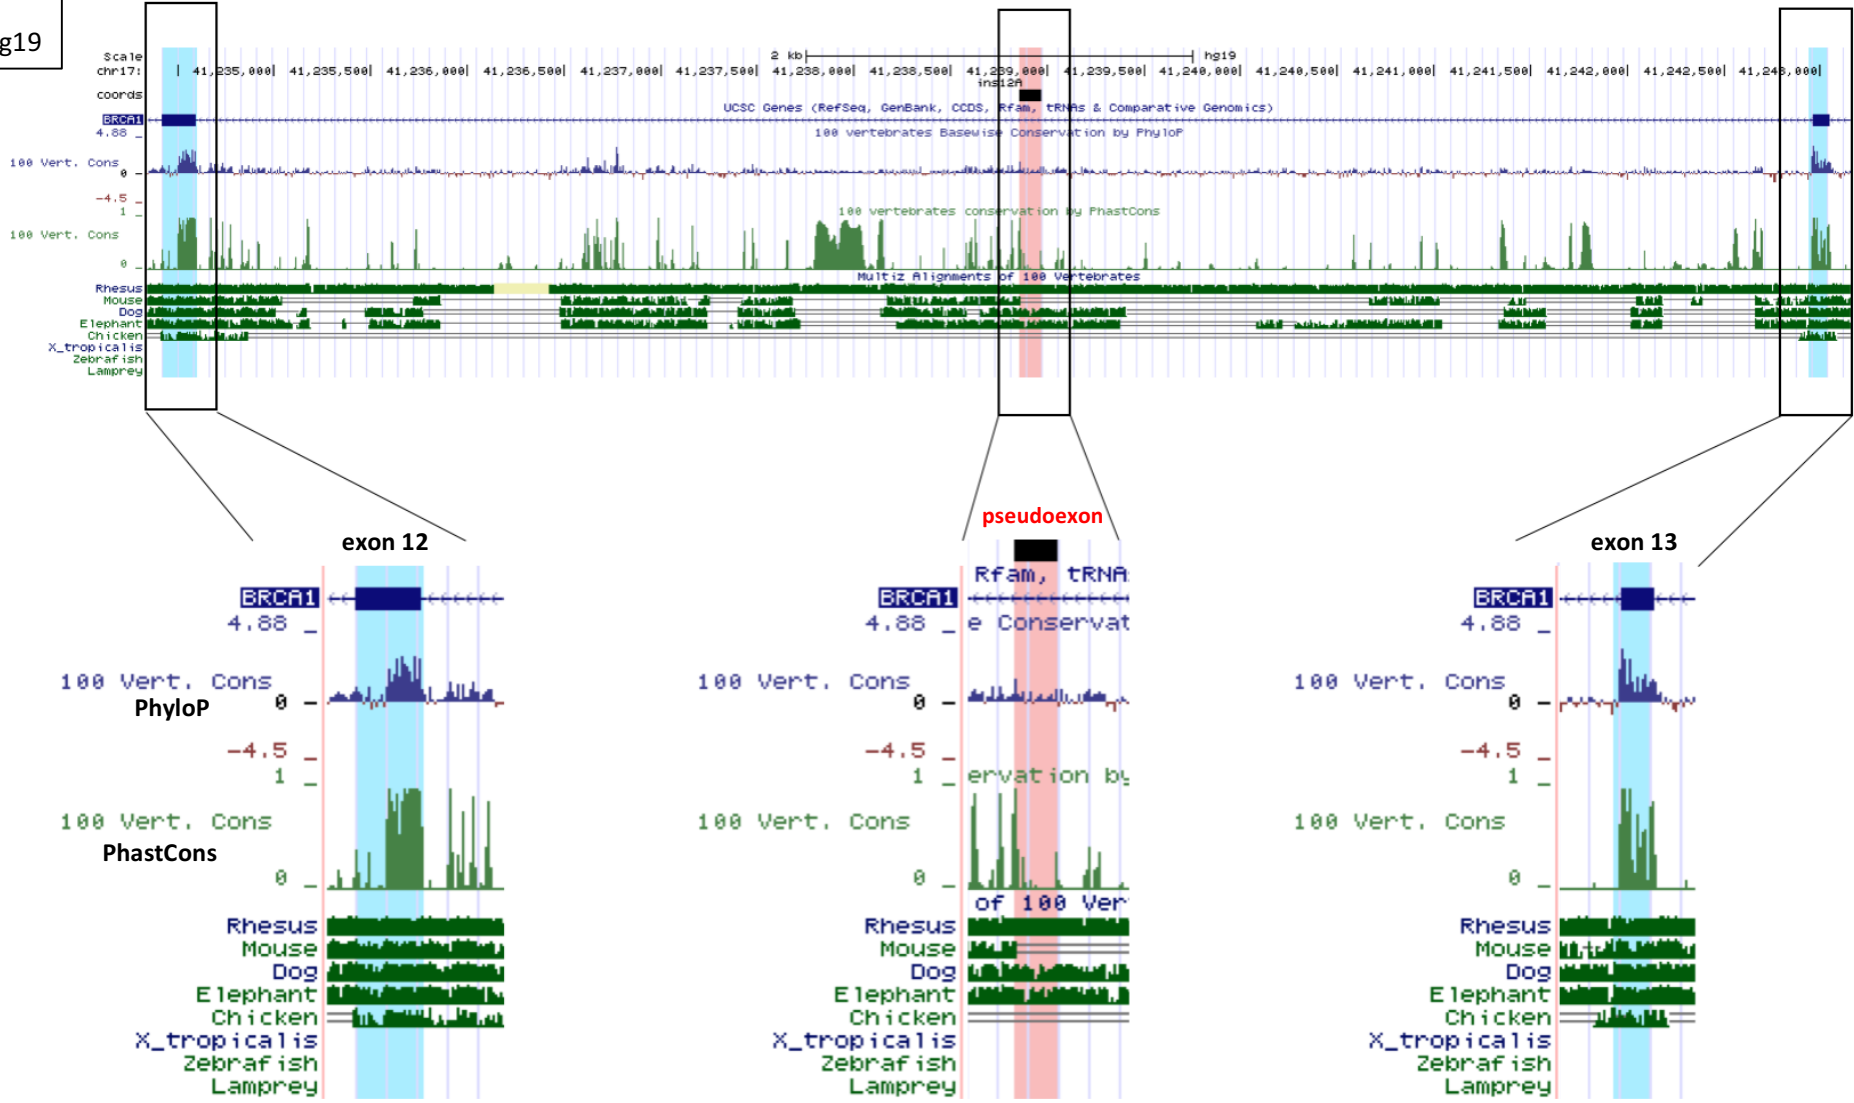

**Supplementary Figure 8. Nucleotide conservation comparison between *BRCA1* pseudoexon (in red) and functional exons 12 and 13 (in blue).** Sequences were compared across 100 vertebrate species using PhyloP, PhastCons and Multiz Alignment tools. Genome assembly GRCh37/hg19 was used and data was visualized in UCSC genome browser (<https://genome.ucsc.edu/>).



***BRCA1* ▼12A** (r.4185\_4186ins4185+3990\_4185+4103) (114nt)  
 chr17:41,238,971-41,238,858

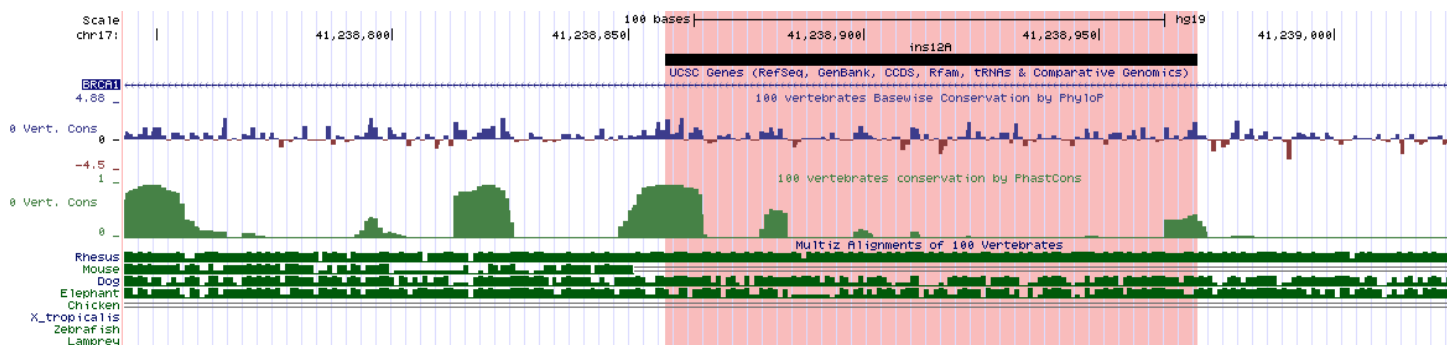

***BRCA1* ▼13A** (r.4357\_4358ins4358-2785\_4358-2719) (66nt)  
 chr: 41,231,416 - 41,231,351

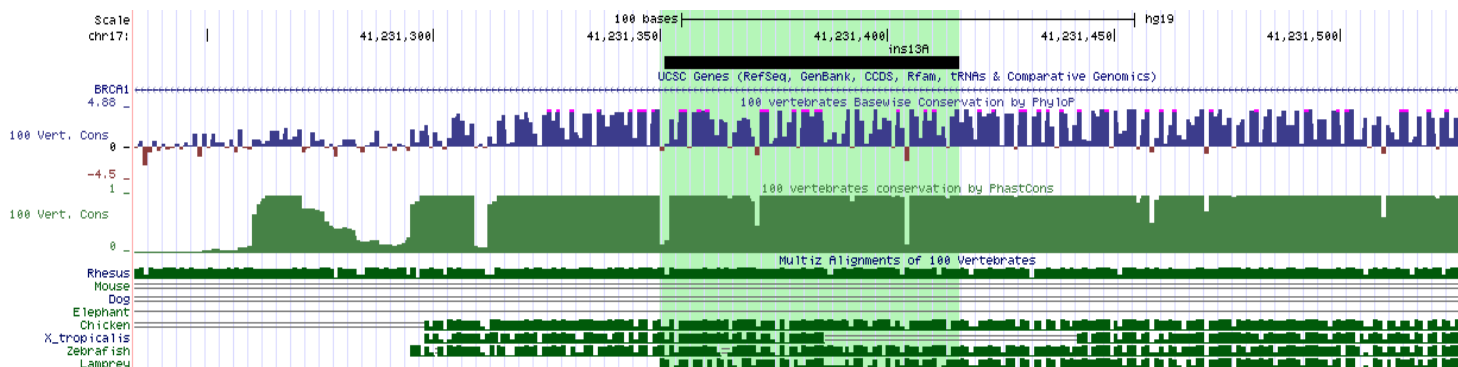

**Supplementary Figure 9. Conservation analysis of pseudoexons included in the aberrant transcript *BRCA1*▼12A (in red) and the alternative isoform *BRCA1*▼13A (in green), respectively.** Sequences were compared across 100 vertebrate species using PhyloP, PhastCons, and Multiz Alignment tools. Genome assembly GRCh37/hg19 was used and data was visualized in UCSC genome browser (<https://genome.ucsc.edu/>).
