# Supplementary material
Source: HighWire-hosted journal article supplement (https://jmg.bmj.com/content/56/2/63)
Supplement: inline-supplementary-material-2 [file inline-supplementary-material-2.pdf]

Supplementary table 1. Primers and PCR conditions for characterization of *BRCA1/2* deep intronic variants at RNA level.

A. Primers for short (up to 1.5kb) and long (1.5-6kb) RT-PCR assays for splicing characterization in variant carriers and controls.

| GENE           | Deep intronic variant (VAR)      | Location                 | Forward Primer               | Reverse Primer             | FL size (bp) | PCR kit                    | TA (°C) | Cycles   |
|----------------|----------------------------------|--------------------------|------------------------------|----------------------------|--------------|----------------------------|---------|----------|
| <b>BRCA1</b>   | c.80+909T>C                      | intron 2                 | 1F-ACAGGCTGTGGGTTTCTC        | 7R-TTGGCACGGTTTCTGTAGC     | 495          | EcoTaq                     | 58      | x35      |
|                | c.81-1360delA                    | intron 2                 | 1F-ACAGGCTGTGGGTTTCTC        | 7R-TTGGCACGGTTTCTGTAGC     | 495          | EcoTaq                     | 58      | x35      |
|                | c.134+382C>T                     | intron 3                 | 1F-ACAGGCTGTGGGTTTCTC        | 7R-TTGGCACGGTTTCTGTAGC     | 495          | EcoTaq                     | 58      | x35      |
|                | c.134+835A>G                     | intron 3                 | 2F-TATCTGCTCTCCGGTTGAA       | 7R-TTGGCACGGTTTCTGTAGC     | 397          | EcoTaq                     | 58      | x35      |
|                | c.135-633C>T                     | intron 3                 | 2F-TATCTGCTCTCCGGTTGAA       | 7R-TTGGCACGGTTTCTGTAGC     | 397          | EcoTaq                     | 58      | x35      |
|                | c.212+253G>A                     | intron 5                 | 2F-TATCTGCTCTCCGGTTGAA       | 7R-TTGGCACGGTTTCTGTAGC     | 397          | EcoTaq                     | 58      | x35      |
|                | c.441+294G>A                     | intron 7                 | 5F-TCAACCAGAAGAAGGGCC        | 10R-TTATCCCTGGTTCCTTGAG    | 491          | EcoTaq                     | 58      | x35      |
|                | c.671-260C>T                     | intron 10                | 1F-ACAGGCTGTGGGTTTCTC        | 11R-CTCTCAGCTGCACGCTTCT    | 1062         | EcoTaq                     | 57      | x35      |
|                | c.4185+194C>G                    | intron 12                | 11F-CAAGAAGAGCAAAGCATGGA     | 13R-TGTTCTGGATTTCGCAGGTC   | 275          | EcoTaq                     | 56      | x35      |
|                | c.4185+1684A>C                   | intron 12                | 11F-CAAGAAGAGCAAAGCATGGA     | 13R-TGTTCTGGATTTCGCAGGTC   | 275          | EcoTaq                     | 56      | x35      |
|                | c.4185+2967G>A                   | intron 12                | 11F-CAAGAAGAGCAAAGCATGGA     | 13R-TGTTCTGGATTTCGCAGGTC   | 275          | EcoTaq                     | 56      | x35      |
|                | c.4185+4105C>T                   | intron 12                | 11F-CAAGAAGAGCAAAGCATGGA*    | 13R-TGTTCTGGATTTCGCAGGTC   | 275          | EcoTaq                     | 56      | x35      |
|                | c.4185+4151A>G                   | intron 12                | 11F-CAAGAAGAGCAAAGCATGGA     | 13R-TGTTCTGGATTTCGCAGGTC   | 275          | EcoTaq                     | 56      | x35      |
|                | c.4186-3530A>G                   | intron 12                | 11F-CAAGAAGAGCAAAGCATGGA     | 13R-TGTTCTGGATTTCGCAGGTC   | 275          | EcoTaq                     | 56      | x35      |
|                | c.4186-2448_4186-2447insGGA      | intron 12                | 11F-CAAGAAGAGCAAAGCATGGA     | 13R-TGTTCTGGATTTCGCAGGTC   | 275          | EcoTaq                     | 56      | x35      |
|                | c.4358-2859G>A                   | intron 13                | 12F-AAGACTGCTCAGGGCTATCCTCTC | 15R-GACTCCCAGAGCAACTGTGC   | 411          | EcoTaq                     | 58      | x35      |
|                | c.4484+643C>G                    | intron 14                | 12F-AAGACTGCTCAGGGCTATCCTCTC | 15R-GACTCCCAGAGCAACTGTGC   | 411          | EcoTaq                     | 58      | x35      |
|                | c.4676-284_4676-283insAGTGAACATT | intron 15                | 14F-GGCCTTTCTGTGACAAGTT      | 16R-TGACTCTGGGCTCTGTCTT    | 351          | EcoTaq                     | 58      | x35      |
|                | c.4676-113C>G                    | intron 15                | 14F-GGCCTTTCTGTGACAAGTT      | 16R-TGACTCTGGGCTCTGTCTT    | 351          | EcoTaq                     | 58      | x35      |
|                | c.4987-635A>G                    | intron 16                | 16F-GGGAGAAGCCAGAATTGACA     | 18R-TCCGTTACACACAAAACCTCAG | 198          | EcoTaq                     | 58      | x35      |
|                | c.5075-1544G>C                   | intron 17                | 16F-GGGAGAAGCCAGAATTGACA     | 18R-TCCGTTACACACAAAACCTCAG | 198          | EcoTaq                     | 58      | x35      |
|                | c.5075-1445G>C                   | intron 17                | 16F-GGGAGAAGCCAGAATTGACA     | 18R-TCCGTTACACACAAAACCTCAG | 198          | EcoTaq                     | 58      | x35      |
|                | c.5075-1061T>A                   | intron 17                | 16F-GGGAGAAGCCAGAATTGACA     | 18R-TCCGTTACACACAAAACCTCAG | 198          | EcoTaq                     | 58      | x35      |
|                | c.5278-2042C>T                   | intron 20                | 20F1-CAAGGTCCAAGCGAGCAAG     | 22R-GGGTGAATGATGAAAGCTCCT  | 160          | EcoTaq                     | 58      | x35      |
|                | c.5278-1708_5278-1697del         | intron 20                | 20F1-CAAGGTCCAAGCGAGCAAG     | 22R-GGGTGAATGATGAAAGCTCCT  | 160          | EcoTaq                     | 58      | x35      |
| c.5278-1238C>T | intron 20                        | 20F1-CAAGGTCCAAGCGAGCAAG | 22R-GGGTGAATGATGAAAGCTCCT    | 160                        | EcoTaq       | 58                         | x35     |          |
| c.5278-801T>G  | intron 20                        | 20F1-CAAGGTCCAAGCGAGCAAG | 22R-GGGTGAATGATGAAAGCTCCT    | 160                        | EcoTaq       | 58                         | x35     |          |
| <b>BRCA2</b>   | c.-39-137_-39-135del             | intron 1                 | 1F5-AAGCGTGAGGGGACAGATTT     | 6R-TGAAACAAACTCCCACATACCA  | 617          | EcoTaq                     | 58      | x35      |
|                | c.316+368A>G                     | intron 3                 | 1F5-AAGCGTGAGGGGACAGATTT     | 6R-TGAAACAAACTCCCACATACCA  | 617          | EcoTaq                     | 58      | x35      |
|                | c.316+1053C>T                    | intron 3                 | 1F5-AAGCGTGAGGGGACAGATTT     | 6R-TGAAACAAACTCCCACATACCA  | 617          | EcoTaq                     | 58      | x35      |
|                | c.316+1669A>G                    | intron 3                 | 1F5-AAGCGTGAGGGGACAGATTT     | 6R-TGAAACAAACTCCCACATACCA  | 617          | EcoTaq                     | 58      | x35      |
|                | c.316+2196A>G                    | intron 3                 | 1F5-AAGCGTGAGGGGACAGATTT     | 6R-TGAAACAAACTCCCACATACCA  | 617          | EcoTaq                     | 58      | x35      |
|                | c.317-339C>T                     | intron 3                 | 1F5-AAGCGTGAGGGGACAGATTT     | 6R-TGAAACAAACTCCCACATACCA  | 617          | EcoTaq                     | 58      | x35      |
|                | c.425+33A>G                      | intron 4                 | 1F5-AAGCGTGAGGGGACAGATTT     | 6R-TGAAACAAACTCCCACATACCA  | 617          | EcoTaq                     | 58      | x35      |
|                | c.632-1101G>A                    | intron 7                 | 4F-AGCAGATGATGTTTCTGTCC      | 10R2-ACCATTACACAGGCCAAAGAC | 809          | EcoTaq                     | 58      | x35      |
|                | c.632-1136dup                    | intron 7                 | 4F-AGCAGATGATGTTTCTGTCC      | 10R2-ACCATTACACAGGCCAAAGAC | 809          | EcoTaq                     | 58      | x35      |
|                | c.632-943dup                     | intron 7                 | 4F-AGCAGATGATGTTTCTGTCC      | 10R2-ACCATTACACAGGCCAAAGAC | 809          | EcoTaq                     | 58      | x35      |
|                | c.6841+1018A>G                   | intron 11                | 10F2-TATGTCCAATAATTAATGATAT  | 14R2-TTGGTCTGCCTGTAGTAATC  | 5570         | Expand™ Long Range dNTPack | 58      | x10; x30 |
|                | c.6937+302C>T                    | intron 12                | 11F2-CTGCCAAGTCATGCCACAC     | 14R2-TTGGTCTGCCTGTAGTAATC  | 475          | EcoTaq                     | 58      | x35      |
|                | c.7007+2200C>T                   | intron 13                | 11F2-CTGCCAAGTCATGCCACAC     | 14R2-TTGGTCTGCCTGTAGTAATC  | 475          | EcoTaq                     | 58      | x35      |
|                | c.7008-1374G>T                   | intron 13                | 11F2-CTGCCAAGTCATGCCACAC     | 14R2-TTGGTCTGCCTGTAGTAATC  | 475          | EcoTaq                     | 58      | x35      |
|                | c.7008-1289A>C                   | intron 13                | 11F2-CTGCCAAGTCATGCCACAC     | 14R2-TTGGTCTGCCTGTAGTAATC  | 475          | EcoTaq                     | 58      | x35      |
|                | c.7436-182G>T                    | intron 15                | 11F2-CTGCCAAGTCATGCCACAC     | 17R-AAGCTTTGGATCCACACCTG   | 1110         | EcoTaq                     | 57      | x35      |
|                | c.8331+1543C>T                   | intron 18                | 16F-TACAGTTGGCTGATGGTGGGA    | 20R-TTGTTGGGCTCCACATATT    | 842          | EcoTaq                     | 56      | x35      |
|                | c.8331+2157A>T                   | intron 18                | 16F-TACAGTTGGCTGATGGTGGGA    | 20R-TTGTTGGGCTCCACATATT    | 842          | EcoTaq                     | 56      | x35      |
|                | c.8332-2898A>G                   | intron 18                | 16F-TACAGTTGGCTGATGGTGGGA    | 20R-TTGTTGGGCTCCACATATT    | 842          | EcoTaq                     | 56      | x35      |
|                | c.8332-2638C>T                   | intron 18                | 16F-TACAGTTGGCTGATGGTGGGA    | 20R-TTGTTGGGCTCCACATATT    | 842          | EcoTaq                     | 56      | x35      |
|                | c.8633-1008G>A                   | intron 20                | 19F-CATCGCTTTTCAGTGATGGA     | 25R-CACTGGAGTTGCTTGCGAG    | 981          | EcoTaq                     | 58      | x35      |
|                | c.8754+759A>G                    | intron 21                | 19F-CATCGCTTTTCAGTGATGGA     | 25R-CACTGGAGTTGCTTGCGAG    | 981          | EcoTaq                     | 58      | x35      |
|                | c.9256+256A>G                    | intron 24                | 19F-CATCGCTTTTCAGTGATGGA     | 25R-CACTGGAGTTGCTTGCGAG    | 981          | EcoTaq                     | 58      | x35      |
|                | c.9257-4843C>T                   | intron 24                | 19F-CATCGCTTTTCAGTGATGGA     | 25R-CACTGGAGTTGCTTGCGAG    | 981          | EcoTaq                     | 58      | x35      |
|                | c.9257-3591G>T                   | intron 24                | 19F-CATCGCTTTTCAGTGATGGA     | 25R-CACTGGAGTTGCTTGCGAG    | 981          | EcoTaq                     | 58      | x35      |
| c.9257-882T>C  | intron 24                        | 19F-CATCGCTTTTCAGTGATGGA | 25R-CACTGGAGTTGCTTGCGAG      | 981                        | EcoTaq       | 58                         | x35     |          |
| c.9501+599T>C  | intron 25                        | 24F-AGATTTACCAGCCACGGGAG | 27R2-CCGATACACAAACCTGAGG     | 1265                       | EcoTaq       | 57                         | x35     |          |

\* A 5' 6-Carboxyfluorescein (6-FAM) labeled primer was also used

**B. Primers for long RT-PCRs and internal sequencing primers to determine allelic imbalance at informative heterozygous loci.**

| GENE         | Long PCR primers (5' to 3') | TA (°C) | FL size (bp) | PCR kit                    | Cycles   | informative exonic variants                |
|--------------|-----------------------------|---------|--------------|----------------------------|----------|--------------------------------------------|
| <b>BRCA1</b> | 11F-CAAGAAGAGCAAAGCATGGA    | 57      | 1882         | EcoTaq                     | x35      | c.4308T>C; c.4837A>G                       |
|              | 24R-ACTCTGTGCTTCCAGCCCTA    |         |              |                            |          |                                            |
| <b>BRCA2</b> | 1F5-AAGCGTGAGGGGACAGATTT    | 56      | 2275         | Expand™ Long Range dNTPack | x10; x30 | c.-52A>G; c.-26G>A; c.865A>C;<br>c.1114A>C |
|              | 11R2-GCAGGCATGACAGAGAATCA   |         |              |                            |          |                                            |
|              | 15F-CCACTCTGCCTCGAATCTC     | 56      | 2858         | Expand™ Long Range dNTPack | x10; x30 | c.7242A>G; c.9976A>T                       |
|              | 27R2-CCGATACACAAACGCTGAGG   |         |              |                            |          |                                            |

| GENE         | internal sequencing primers (5' to 3') |
|--------------|----------------------------------------|
| <b>BRCA1</b> | 11F-CAAGAAGAGCAAAGCATGGA               |
|              | 14F-GGCCTTTCTGCTGACAAGTT               |
|              | 16R-TGACTCTGGGGCTCTGTCTT               |
|              | 18R-TCCGTTACACACAAACTCAG               |
| <b>BRCA2</b> | 6R-TGAAACAAACTCCCACATACCA              |
|              | 9F-TCCAATCATGATGAAAGTCTGA              |
|              | 16R-TCCACCATCAGCCAAGTGA                |
|              | 27R2-CCGATACACAAACGCTGAGG              |

Supplementary Table 2. *BRCA1/2* deep intronic variants identified in >1 patient from our cohort that are predicted to alter splicing.

| GENE                      | HGVS nomenclature* | Location    | dbSNP       | Population variant frequencies (gnomAD)                                                        | Frequency of occurrence in our cohort | Local Splicing Effect (Alamut software) | ClinVar review status                                                           |
|---------------------------|--------------------|-------------|-------------|------------------------------------------------------------------------------------------------|---------------------------------------|-----------------------------------------|---------------------------------------------------------------------------------|
| <i>BRCA1</i>              | c.80+1312A>G       | intron 2    | -           | -                                                                                              | 1,04%                                 | New Acceptor Site                       | not reported                                                                    |
|                           | c.134+224dup       | intron 3    | -           | ALL:4.46% - AFR:13.85% - AMR:1.17% - EAS:0.074% - NFE:0.17% - FIN:1.19% - OTH:1.14%            | 2,60%                                 | Cryptic Acceptor Weakly Activated       | not reported                                                                    |
|                           | c.442-1887C>A      | intron 7    | rs191341657 | ALL:0.18% - AFR:0.023% - AMR:0.36% - NFE:0.27% - FIN:0.26% - OTH:0.10%                         | 2,08%                                 | Cryptic Acceptor Strongly Activated     | not reported                                                                    |
|                           | c.594-447A>G       | intron 9    | -           | -                                                                                              | 2,08%                                 | Cryptic Acceptor Strongly Activated     | not reported                                                                    |
|                           | c.4358-2509C>A     | intron 13   | rs562207926 | ALL:0.097% - AFR:0.034% - ASJ:0.33% - NFE:0.17% - FIN:0.029%                                   | 1,04%                                 | New Acceptor Site                       | not reported                                                                    |
|                           | c.5193+1234del     | intron 19   | -           | ALL:0.57% - AFR:0.23% - AMR:3.07% - ASJ:0.83% - NFE:0.34% - FIN:3.69% - OTH:0.91%              | 28,13%                                | New Donor Site                          | not reported (c.5193+1232_5193+1234del is classified as benign by expert panel) |
| <i>BRCA2</i>              | c.6841+625T>C      | intron 11   | -           | ALL:0.014% - AFR:0.012% - NFE:0.021%                                                           | 1,04%                                 | Cryptic Acceptor Strongly Activated     | not reported                                                                    |
|                           | c.6841+686del      | intron 11   | -           | ALL:0.84% - AFR:0.34% - AMR:4.14% - NFE:0.49% - FIN:9.59% - OTH:2.11%                          | 47,92%                                | New Donor Site                          | not reported                                                                    |
|                           | c.6841+686dup      | intron 11   | -           | ALL:2.11% - AFR:3.46% - AMR:5.73% - ASJ:0.75% - EAS:0.37% - NFE:0.58% - FIN:12.03% - OTH:3.16% | 9,90%                                 | New Donor Site                          | not reported                                                                    |
|                           | c.6937+239A>T      | intron 12   | rs190434310 | ALL:0.27% - AFR:0.11% - AMR:0.12% - ASJ:0.33% - NFE:0.41% - FIN:0.086% - OTH:0.61%             | 1,04%                                 | Cryptic Acceptor Strongly Activated     | not reported                                                                    |
|                           | c.6937+594T>G **   | intron 12   | rs191253965 | ALL:0.036% - AMR:0.95% - ASJ:0.33% - NFE:0.0067% - OTH:0.10%                                   | 1,04%                                 | Cryptic Donor Strongly Activated        | benign (reviewed by expert panel)                                               |
|                           | c.7007+811C>T      | intron 13   | rs552519251 | ALL:0.12% - AFR:0.046% - AMR:0.12% - NFE:0.21%                                                 | 2,08%                                 | New Donor Site                          | not reported                                                                    |
|                           | c.8331+3112A>G     | intron 18   | -           | -                                                                                              | 1,56%                                 | Cryptic Donor Strongly Activated        | not reported                                                                    |
|                           | c.8332-1343C>T     | intron 18   | rs564842026 | ALL:0.013% - AMR:0.12% - FIN:0.087%                                                            | 1,04%                                 | Cryptic Acceptor Strongly Activated     | not reported                                                                    |
|                           | c.8332-2706G>A     | intron 18   | rs190505464 | ALL:0.074% - AFR:0.023% - AMR: 0.24% - NFE:0.13%                                               | 1,56%                                 | Cryptic Donor Strongly Activated        | not reported                                                                    |
| c.9256+2960_9256+2991 dup | intron 24          | rs140864865 | -           | 1,04%                                                                                          | New Donor Site                        | not reported                            |                                                                                 |

\* *BRCA1* and *BRCA2* variants are annotated according to NM\_007294.3 and NM\_000059.3 transcripts. HGVS nomenclature guidelines were used for variant annotation (<http://varnomen.hgvs.org/>)

\*\* First reported in Anczukow et al., 2012
